# Supplementary material for: LATS1 and LATS2 suppress breast cancer progression by maintaining cell identity and metabolic state
Source: Life Sci Alliance. 2018 Oct 30;1(5):e201800171. doi: 10.26508/lsa.201800171 (PMC6238411; doi:10.26508/lsa.201800171)
Supplement: Supplementary file 1 [file LSA-2018-00171_TableS1.xlsx]

## Sheet: A
Pathway enrichment analysis (GeneAnalytics, Pathways)
MCF7 siLATS2 vs. siControl (FC>1.5, adjp-val<0.05)						ZR75-1 siLATS2 vs. siControl (FC>1.5, adjp-val<0.05)						ZR75-1 LATS2 OE vs. control (FC>1.5, adjp-val<0.05)
Score	SuperPath Name	# SuperPath Total Genes	# SuperPath Matched Genes	Matched Genes (Symbols)		Score	SuperPath Name	# SuperPath Total Genes	# SuperPath Matched Genes	Matched Genes (Symbols)		Score	SuperPath Name	# SuperPath Total Genes	# SuperPath Matched Genes	Matched Genes (Symbols)
45.9339	Cytokine Signaling in Immune System	760	21	TRIM22, GBP1, LGALS9, UBA7, OAS2, OASL, XAF1, PSMB9, HERC5, RASGRP1, HMOX1, RET, IFIT2, IFIT3, IFNL1, RSAD2, CCL5, CCL22, IRF1, ISG20, MX2		14.5132	TGF-Beta Pathway	652	14	TYMP, MAP2, CXCL12, CXCR4, GDF15, GNB4, EPHA4, EPHA2, TGFA, IL1R1, IL6R, CCL22, IRF9, IRS2		14.0037	Tuberculosis	179	6	NOD2, TGFB2, CALML5, CASP10, FCGR3B, IRAK2
43.183	Interferon Gamma Signaling	202	13	TRIM22, GBP1, UBA7, OAS2, OASL, XAF1, HERC5, IFIT2, IFIT3, RSAD2, IRF1, ISG20, MX2		14.2298	HIF-1-alpha Transcription Factor Network	65	5	CXCL12, CXCR4, NT5E, HMOX1, ID2		13.4681	Validated Targets of C-MYC Transcriptional Repression	61	4	GADD45A, ID2, CDKN1A, CDKN2B
35.5971	Immune Response IFN Alpha/beta Signaling Pathway	91	9	OAS2, OASL, XAF1, IFIT2, IFIT3, RSAD2, IRF1, ISG20, MX2		13.5032	ERK Signaling	1178	19	COL12A1, TYMP, CXCL12, CXCR4, GDF15, GNB4, PPP1R3F, BIRC3, EPHA4, EPHA2, TGFA, PIP4K2A, IL1R1, TNFRSF21, TNFRSF12A, IL6R, CCL22, IRS2, MYO1B		12.5138	MiR-517 Relationship With ARCN1 and USP1	5	2	ID2, CDKN1A
30.5784	Innate Immune System	2129	26	CNN2, TRIM22, GBP1, ADCY5, NLRC5, LGALS9, UBA7, OAS2, OASL, XAF1, PSMB9, HERC5, RASGRP1, HMOX1, RET, IFIT2, IFIT3, IFNL1, TMEM173, RSAD2, CCL5, CCL22, IRF1, ISG20, CFB, MX2		11.9285	Akt Signaling	681	13	TYMP, CXCL12, CXCR4, GDF15, GNB4, EPHA4, EPHA2, TGFA, IL1R1, TNFRSF21, TNFRSF12A, IL6R, CCL22		12.4062	Primary Focal Segmental Glomerulosclerosis FSGS	74	4	CLDN1, UTRN, SYNPO, CDKN1A
20.1412	RIG-I/MDA5 Mediated Induction of IFN-alpha/beta Pathways	159	7	NLRC5, UBA7, HERC5, IFNL1, TMEM173, CCL5, IRF1		11.6994	NF-kappa B Signaling Pathway	95	5	CXCL12, BIRC3, RELB, ICAM1, IL1R1		12.1559	Ectoderm Differentiation	144	5	POU2F2, PTPRB, C1GALT1, FGFR2, KIFC3
17.1414	Type II Interferon Signaling (IFNG)	37	4	GBP1, PSMB9, IFIT2, IRF1		10.7465	PEDF Induced Signaling	743	13	CXCL12, CXCR4, GDF15, PPP1R3F, EPHA4, EPHA2, IL1R1, IL27RA, TNFRSF21, IL32, TNFRSF12A, IL6R, CCL22		11.7155	TGF-beta Signaling Pathway (KEGG)	84	4	BMPR1B, ID2, TGFB2, CDKN2B
13.4982	Microglia Activation During Neuroinflammation: Microglia Polarization	71	4	TGFB2, TGM2, CCL5, CCL22		10.4462	Cytokine Signaling in Immune System	760	13	BIRC3, HMOX1, RELB, ICAM1, IFI6, IL1R1, IL27RA, IL32, TNFRSF12A, IL6R, CCL22, IRF9, IRS2		11.6927	Gastric Cancer	241	6	GADD45A, HMOX1, TGFB2, FGFR2, CDKN1A, CDKN2B
9.14898	Cholesterol and Sphingolipids Transport / Recycling to Plasma Membrane in Lung (normal and CF)	19	2	APOL1, APOL6		10.1483	NF-kappaB Signaling	327	8	CXCL12, CXCR4, GDF15, NT5E, HMOX1, RELB, TNFRSF12A, CEACAM5		11.6927	NF-KappaB Family Pathway	241	6	MAP3K14, GDF15, BCL3, TGFB2, IRAK2, FGFR2
8.60065	TGF-beta Signaling Pathway (KEGG)	84	3	TGFB2, INHBE, CDKN2B		10.1068	PAK Pathway	682	12	TYMP, CXCL12, CXCR4, GDF15, PTPN21, TGFA, IL1R1, TNFRSF21, TNFRSF12A, IL6R, CCL22, MYO1B		11.4628	Cellular Senescence (KEGG)	160	5	GADD45A, TGFB2, CALML5, CDKN1A, CDKN2B
8.03347	Toll-like Receptor Signaling Pathway	322	5	GBP1, OAS2, TGFB2, TMEM173, CCL5		10.105	Apoptosis and Autophagy	183	6	TYMP, CXCR4, GDF15, BIRC3, TNFRSF21, TNFRSF12A		11.1647	Small Cell Lung Cancer	93	4	GADD45A, LAMB1, CDKN1A, CDKN2B
7.93994	NF-kappaB Signaling	327	5	LGALS9, HMOX1, RSAD2, CCL5, IRF1		9.46203	Neural Stem Cell Differentiation Pathways and Lineage-specific Markers	79	4	MAP2, CXCR4, PROM1, SYP		10.616	IL-1 Family Signaling Pathways	103	4	MAP3K14, HMOX1, IRAK2, FOSL1
7.27948	G-protein Signaling_H-RAS Regulation Pathway	37	2	RASGRP1, RET		9.3459	Type II Interferon Signaling (IFNG)	37	3	ICAM1, IFI6, IRF9		10.3628	TNF Signaling Pathway	108	4	NOD2, MAP3K14, BCL3, CASP10
7.18435	Pathways in Cancer	526	6	ADCY5, RASGRP1, HMOX1, RET, TGFB2, CDKN2B		9.03574	EphB-EphrinB Signaling	144	5	CXCL12, CXCR4, GNB4, EPHA4, EPHA2		10.2806	Pathways in Cancer	526	8	GADD45A, LAMB1, HMOX1, TGFB2, CALML5, FGFR2, CDKN1A, CDKN2B
6.92859	Elastic Fibre Formation	42	2	LOXL2, TGFB2		8.99267	NRF2 Pathway	145	5	SLC7A11, ME1, HMOX1, EPHA2, TGFA		9.50467	C-type Lectin Receptor Signaling Pathway	127	4	MAP3K14, BCL3, CALML5, FOSL1
6.50455	Interleukin-10 Signaling	49	2	CCL5, CCL22		8.84066	Angiogenesis (CST)	89	4	TYMP, HMOX1, EPHA2, TGFA		9.46346	Osteoclast Differentiation	128	4	MAP3K14, TGFB2, FCGR3B, FOSL1
6.09185	Coregulation of Androgen Receptor Activity	57	2	LATS2, FHL2		8.54316	P70S6K Signaling	391	8	TYMP, CXCL12, GDF15, GNB4, PPP1R3F, EPHA4, EPHA2, TGFA		9.30262	Glioma	224	5	GADD45A, CALML5, FGFR2, CDKN1A, CDKN2B
5.97248	Phosphatidylethanolamine Biosynthesis II	5	1	ETNK2		8.28864	Photodynamic Therapy-induced NF-kB Survival Signaling	48	3	BIRC3, RELB, ICAM1		9.3021	Direct P53 Effectors	132	4	GADD45A, GDF15, CASP10, CDKN1A
5.90798	Validated Targets of C-MYC Transcriptional Repression	61	2	CCL5, CDKN2B		8.28864	Signaling By Slit	48	3	CXCL12, CXCR4, GNB4		9.3021	FoxO Signaling Pathway	132	4	GADD45A, TGFB2, CDKN1A, CDKN2B
5.82079	Lung Fibrosis	63	2	HMOX1, CCL5		8.20569	Interleukin-10 Signaling	49	3	ICAM1, IL1R1, CCL22		9.03227	Toxoplasmosis	139	4	LAMB1, HSPA6, TGFB2, FCGR3B
5.73652	HIF-1-alpha Transcription Factor Network	65	2	HMOX1, CITED2		8.12721	NF-KappaB Family Pathway	241	6	TYMP, CXCL12, GDF15, RELB, TGFA, IL1R1		8.9212	Common Cytokine Receptor Gamma-Chain Family Signaling Pathways	142	4	MAP3K14, BCL3, CDKN1A, FOSL1

## Sheet: B
IPA Diseases or Function annotations - Cell death/viability
	Diseases or Functions Annotation	p-Value	Genes overlap
ZR75 siL2	Cell death	1.11e-15	ABCA3,ABCC3,ACOX2,ADAM17,ADORA1,AGR2,AKT3,APOL6,ARHGAP35,ATP13A2,AURKA,BAG1,BAG3,BAG5,BHLHE40,BIRC3,BTG2,C3,CABLES2,CALM1 (includes others),CALR,CANX,CAPN2,CAST,CCND1,CCP110,CD24,CD99,CDC34,CEACAM5,CEACAM6,CERS6,CFLAR,CITED2,CNN2,CNOT11,CSNK1A1,CTBP1,CUL4A,CXCL12,CXCR4,DDR1,DHRS2,DSTYK,DUSP4,EFEMP1,EHF,EIF1AX,EIF2A,EIF2S1,EIF4G2,ENC1,EPHA2,EZR,FASN,FGFR2,FGFR4,FHL2,FLNB,FOXK2,FOXM1,GDF15,GGPS1,GR…
	Cell death of tumor cell lines	1.91e-15	ABCA3,ADAM17,AGR2,AKT3,ATP13A2,AURKA,BAG1,BAG3,BHLHE40,BIRC3,BTG2,CABLES2,CALR,CAPN2,CAST,CCND1,CCP110,CD24,CD99,CDC34,CEACAM6,CERS6,CFLAR,CNN2,CNOT11,CSNK1A1,CTBP1,CXCL12,CXCR4,DUSP4,EFEMP1,EHF,EIF1AX,EIF2A,EIF2S1,EIF4G2,ENC1,EPHA2,EZR,FASN,FGFR2,FLNB,FOXK2,FOXM1,GDF15,H2AFX,HK2,HMGCS1,HMOX1,HOTAIR,HSPA5,HSPA8,HSPB8,HSPD1,ID3,IFI6,IGFBP4,IGFBP5,IL32,IL6R,IL6ST,INTS3,IRF1,IRF2BP2,IRS1,LAMP1,LATS2…
	Cell death of carcinoma cell lines	1.28e-07	ADAM17,AKT3,AURKA,CCND1,CCP110,CERS6,CFLAR,CXCL12,EIF2S1,EPHA2,FASN,FGFR2,HK2,HMOX1,HOTAIR,HSPA5,ID3,IRS1,MAPK14,MTDH,MTOR,NACC1,NFIB,NFKBIA,NQO1,NR3C1,NT5E,OGT,PARP1,PKM,PMEPA1,PPP2CA,PRKCD,RRM2,SCD,SEMA3B,SERPINA3,SLC7A11,SMARCD1,STAT3,TNFRSF10B,UGCG
	Cell death of leukemia cell lines	2.26e-06	ABCA3,BIRC3,CALR,CCND1,CD99,CFLAR,CXCL12,CXCR4,EIF2A,HMOX1,HSPA8,LGALS3,LGALS3BP,MAP3K1,MAPK14,MTDH,NFKBIA,NR3C1,OGT,PAK2,PARP1,PBX1,PKM,PRKACA,PRKCD,PRKCI,RAD21,RPS19,S100A8,SGMS1,STAT3,STAT5B,TGFA,THBS1,TNFRSF10B,TUBB6,UGCG,WEE1
	Cell death of epithelial cells	3.06e-06	ATP13A2,BAG1,BIRC3,CFLAR,CITED2,EPHA2,FASN,FGFR4,HK2,HSPA5,HSPB8,HSPD1,IRF1,IRS1,ITGA3,LDHA,MAP3K1,MAPK14,NFE2L2,NFKBIA,NTRK3,PAK2,PLCB1,PPP2CA,PRKCI,PRMT1,RAD21,SGPL1,SMAD3,STAT3,STRAP,TCF12,TFRC,TIMP1,TNFRSF10B,YAP1
	Cell death of breast cancer cell lines	5.68e-06	BAG1,BAG3,BIRC3,CCND1,CFLAR,DUSP4,EPHA2,FASN,FGFR2,FOXM1,HK2,HMOX1,HSPA5,HSPB8,HSPD1,IGFBP5,IRF1,IRF2BP2,LGALS3,MAPK14,MTDH,NACC2,NFKBIA,NQO1,PARP1,PGRMC1,PKM,PRMT1,SCARB1,SDC1,SLC9A1,SMARCE1,SND1,STAT3,TFAP2C,TFRC,TNFRSF10B,TNS4,UGCG,VDR
MCF7 siL2	Cell death	1.89e-14	ACKR3,AMIGO2,APOL1,APOL6,ASNS,ATP1A1,B2M,B4GALT5,BAG3,BCL2L11,BTG2,CANX,CCL5,CD47,CD55,CDC42,CEBPB,CFB,CITED2,CNN2,CTSD,DDIT4,DDX58,DHCR24,DKK1,DSTYK,EIF2AK2,ETS2,FHL2,FOSL2,FOXM1,G6PD,GDF15,GRB10,HIF1A,HMOX1,HSPA8,HSPB8,IFIH1,IFIT2,IFIT3,IFNL1,IRF1,ISG15,JAK1,KCNN4,KLF4,LATS2,LGALS9,LPCAT1,MAGED1,MAOB,MLLT11,MX1,MYBL2,MYD88,NCOA4,NFKBIA,NRP1,OAS1,OAS3,OPTN,P4HB,PARP14,PGRMC1,PIK3R1,PLSCR1,PML,PN…
	Cell death of tumor cell lines	1.12e-10	ACKR3,ASNS,ATP1A1,B2M,BAG3,BCL2L11,BTG2,CD47,CD55,CDC42,CEBPB,CNN2,CTSD,DDIT4,DDX58,DHCR24,DKK1,EIF2AK2,ETS2,FOXM1,G6PD,GDF15,HIF1A,HMOX1,HSPA8,HSPB8,IFNL1,IRF1,JAK1,KLF4,LATS2,LGALS9,LPCAT1,MYBL2,NCOA4,NFKBIA,NRP1,OAS3,P4HB,PARP14,PGRMC1,PIK3R1,PLSCR1,PML,RASD1,RET,RGS16,SCD,SERP1,SPIN1,SQSTM1,STAT1,SULF2,TFAP2C,TGFB2,TGM2,THBS1,TMBIM6,TMSB10/TMSB4X,TNFRSF21,UBA7,USP18,VDR,XAF1,XBP1,XPR1
	Cell death of breast cancer cell lines	6.62e-08	B2M,BAG3,BCL2L11,CDC42,CEBPB,DDIT4,ETS2,FOXM1,HIF1A,HMOX1,HSPB8,IRF1,NFKBIA,NRP1,OAS3,PGRMC1,PML,RGS16,STAT1,TFAP2C,TGFB2,VDR,XBP1
ZR75 L2 OE	Cell viability of cancer cells	0.014	BMP2,CXCL8,EGFR,FHIT,HMOX1,TERT,VEGFC
