# Supplementary material for: LATS1 and LATS2 suppress breast cancer progression by maintaining cell identity and metabolic state
Source: Life Sci Alliance. 2018 Oct 30;1(5):e201800171. doi: 10.26508/lsa.201800171 (PMC6238411; doi:10.26508/lsa.201800171)
Supplement: Supplementary file 4 [file LSA-2018-00171_TableS4.xlsx]

## Sheet: Sheet1
Genes commonly downregulated in LATS2L human lumB and Lats2-CKO PyMT				Genes downregulated in LATS2L breast tumors					Genes down regulated in LATS1L tumors
CCDC3				ANXA8					GFRA1
AQP7				BBOX1					AGR3
RBP4				CRYAB					ATRNL1
TUSC5				FOLR1					SYTL5
CDO1				FXYD1					GRIK3
ADIPOQ				KLK10					THSD4
NEGR1				KLK5					TBC1D9
EBF1				KLK6					SLC39A6
PDE3B				KLK7					SYT9
ACVR1C				KRT14					BMPR1B
ABCD2				KRT17					CA12
AOC3				KRT5					TOX3
LPL				KRT6B					FSIP1
CD300LG				MMP7					ELOVL2
GSN				OLFM4					AGR2
SGCE				PLA2G2A					SCUBE2
PTPRD				SAA1					KLHDC7A
PLIN1				SAA2					ABCC11
PLIN4				STAC2					DCDC2
IDO1				TRIM29					CEACAM6
