# Supplementary material for: LATS1 and LATS2 suppress breast cancer progression by maintaining cell identity and metabolic state
Source: Life Sci Alliance. 2018 Oct 30;1(5):e201800171. doi: 10.26508/lsa.201800171 (PMC6238411; doi:10.26508/lsa.201800171)
Supplement: Supplementary file 5 [file LSA-2018-00171_TableS5.xlsx]

## Sheet: Sheet1
siRNA SMARTpool (Dharmacon)				Plasmids		qRT primers				Antibodies
D-001210-05-50		Non targeting		pEGFP-hsLATS2		Gene	Forward	Reverse		Antibody	Company	Cat. No	Aplication
M-003865-02-0005	Human	LATS2		pEGFP-hsLATS1		hsLATS1	TCATCAGCAGCGTCTACATCG	TCCAACCCGCATCATTTCAT		LATS2	Novus NB200-199	NB200-199	WB 1:5000
M-004632-00-0005	Human	LATS1		pWZL-myc-hsLATS2		hsLATS2	GCAGATTGTGCGGGTCATTA	GGCATGAGCCCCTTTCCT		GAPDH	Millipore	MAB374	WB 1:10000
M-012200-00-0005	Human	YAP		pWZL		hsPPARG	CACTGGATTCAGGTGGACTCACAA	AGTTGGAAACATCGTCCCAGAGGT		PPARg	Santa Cruz	sc-7273	WB, ISX
M-016083-00-0005	Human	WWTR1		pEGFP		hsLPL	TCCGTGGCTACCTGTCATTT	TTTTGGCACCCAACTCTCAT		CC3	Cell Signaling	9661	ISX
						hsPPARG	GGAGTTCATGCTTGTGAAGGA	TGGATCCGACAGTTAAGATCACA		γH2AX, Ser139	Millipore	05-636	IHC 1:1000
						mmLats1	AGCAGCACGTAGAGAACGTCC	AATCCAACCCGCATCATTTC		CC3	Cell Signaling	9661L	IHC 1:100
						mmLats2	GATCAGGATGGAGGTCTTCCC	GACACTTTCAATGGCCAGGGT		ER	Abcam	ab32063	IHC 1:100
						mmPparg	CATTGAGTGCCGAGTCTGTG	TTCAATCGGATGGTTCTTCG		CK14	Abcam	ab7800	IHC 1:150
						mmPlin1	GGTGTACAGGGTGCCAGC	TCTTTTCCTCCAGGTGGTCC		LATS1	Sigma	HPA031804	IHC 1:200
						mmLpl	TGTCAGCTGGCTACACCAAG	GGCTCCAAGGCTGTACCCTA		LATS2	Abcam	ab110780	IHC 1:400
						genotyping primers				SMA	DAKO (clone 1A4)	M0851	IHC 1:100
						Gene	Forward	Reverse		myc - 9E10	in house made hybridoma		WB 1:40
						Cre	GCGGTCTGGCAGTAAAAACTATC	GTGAAACAGCATTGCTGTCACTT
						Lats1	TTGTTGCTGGTGTTGTTTCC	ATGAATGAACCTGAGGCTGC
						Lats1-del	AGGATGTAGTGAAGGCGTGTAAC	AGACCTCGTCGCACAGAATG
						Lats2	GCGCATGCCTTTAATCCTAGC	ACACATTCCCCTCCACTGAC
						Lats2-del	CTATCGCTAGGCTGTTCCCAC	CTGAGCAACGACTCCAGGAAC
						Pymt	GGAAGCAAGTACTTCACAAGGG	GGAAAGTCACTAGGAGCAGGG
